# Supplementary material for: Facile access to 4′-(N-acylsulfonamide) modified nucleosides and evaluation of their inhibitory activity against SARS-CoV-2 RNA cap N7-guanine-methyltransferase nsp14
Source: Royal Society of Chemistry journal article supplement (doi:10.1039/d2ob01569b), 2022-01-01
Supplement: d2ob01569b1.pdf [file d2ob01569b1.pdf]

**Figure S1.** Modeling results in the cap-binding pocket of SARS-CoV nsp14 with 7d (left) and 8a (right). Phe426 is shown in green.  $\pi$ - $\pi$  stacking interactions (purple) are shown.

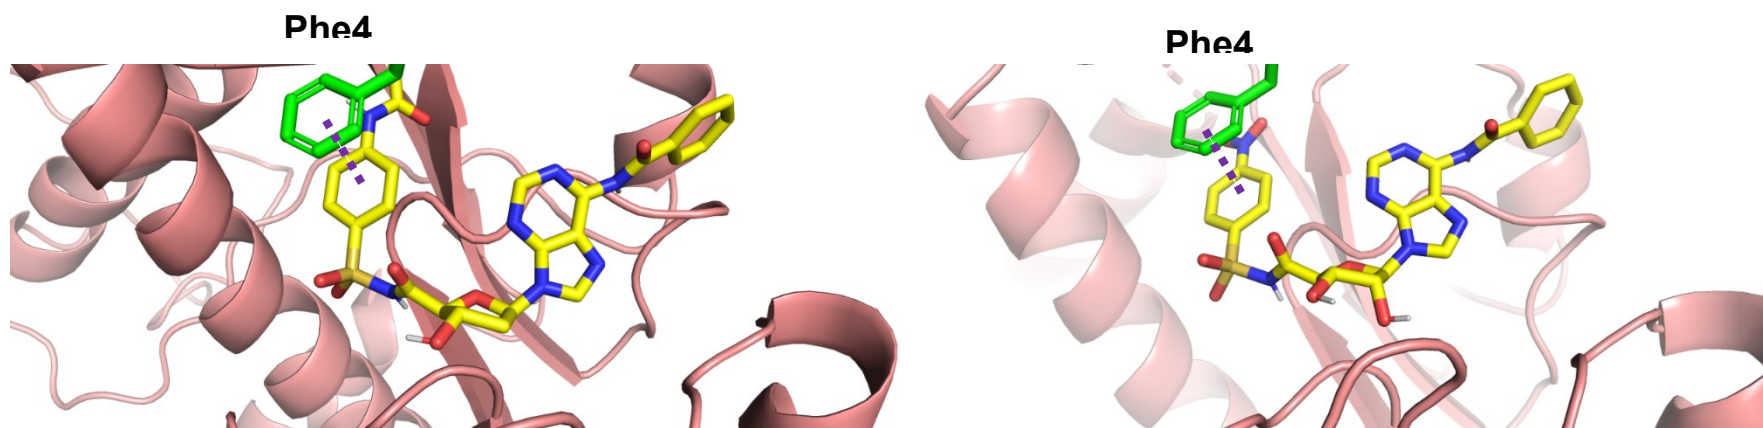

Modeling results in the cap-binding pocket of SARS-CoV nsp14 with 7d (left) and 8a (right). Phe426 is shown in green.  $\pi$ - $\pi$  stacking interactions (purple) are shown.
